# Supplementary material for: Distinct Expression of Inflammatory Features in T Helper 17 Cells from Multiple Sclerosis Patients
Source: MDPI journal article supplement (doi:10.3390/cells8060533), 2019-06-04

**Supplementary figure S1. The activity of MS disease does not modulate IL-1R1 expression on differentiated Th17 cells**

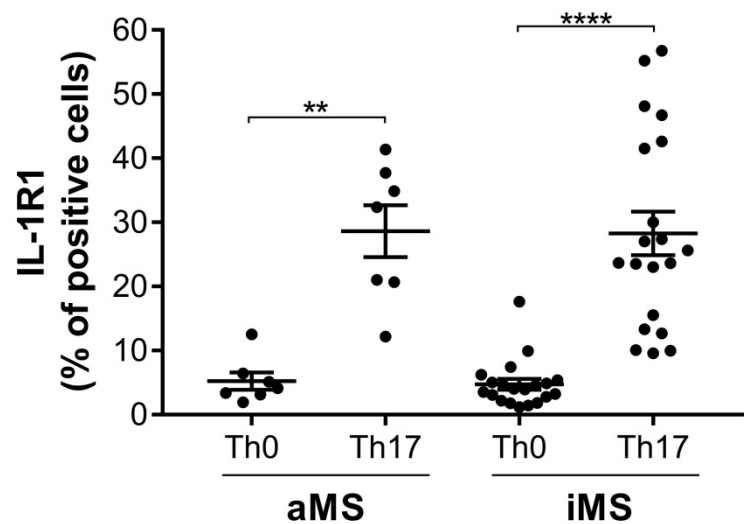

**Supplementar figure S2. The synergy between Th17 polarizing cytokines contributes to IL-1R1 expression on Th17 cells.**

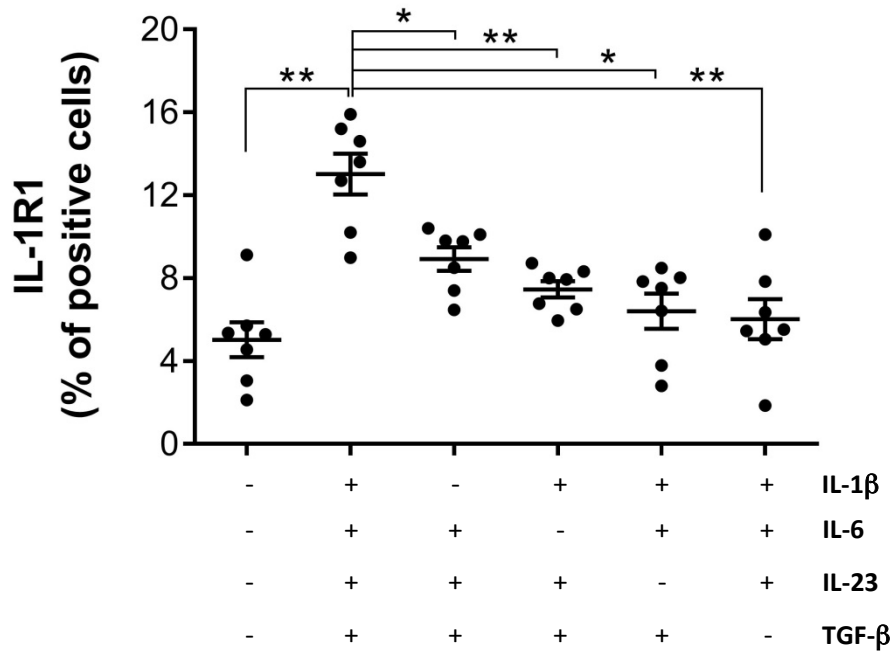

Supplement: s1 [file s1]
